# Supplementary figures and images for: Porous nanocomposites of zirconium dioxide and silicateElectronic supplementary information (ESI) available: Fig. S1: pore size distributions (PSD) of the calcined ZrO2-nanocomposites. See http://www.rsc.org/suppdata/cc/b2/b207779p/
Source: Royal Society of Chemistry journal article supplement (doi:10.1039/b207779p), 2002-10-29

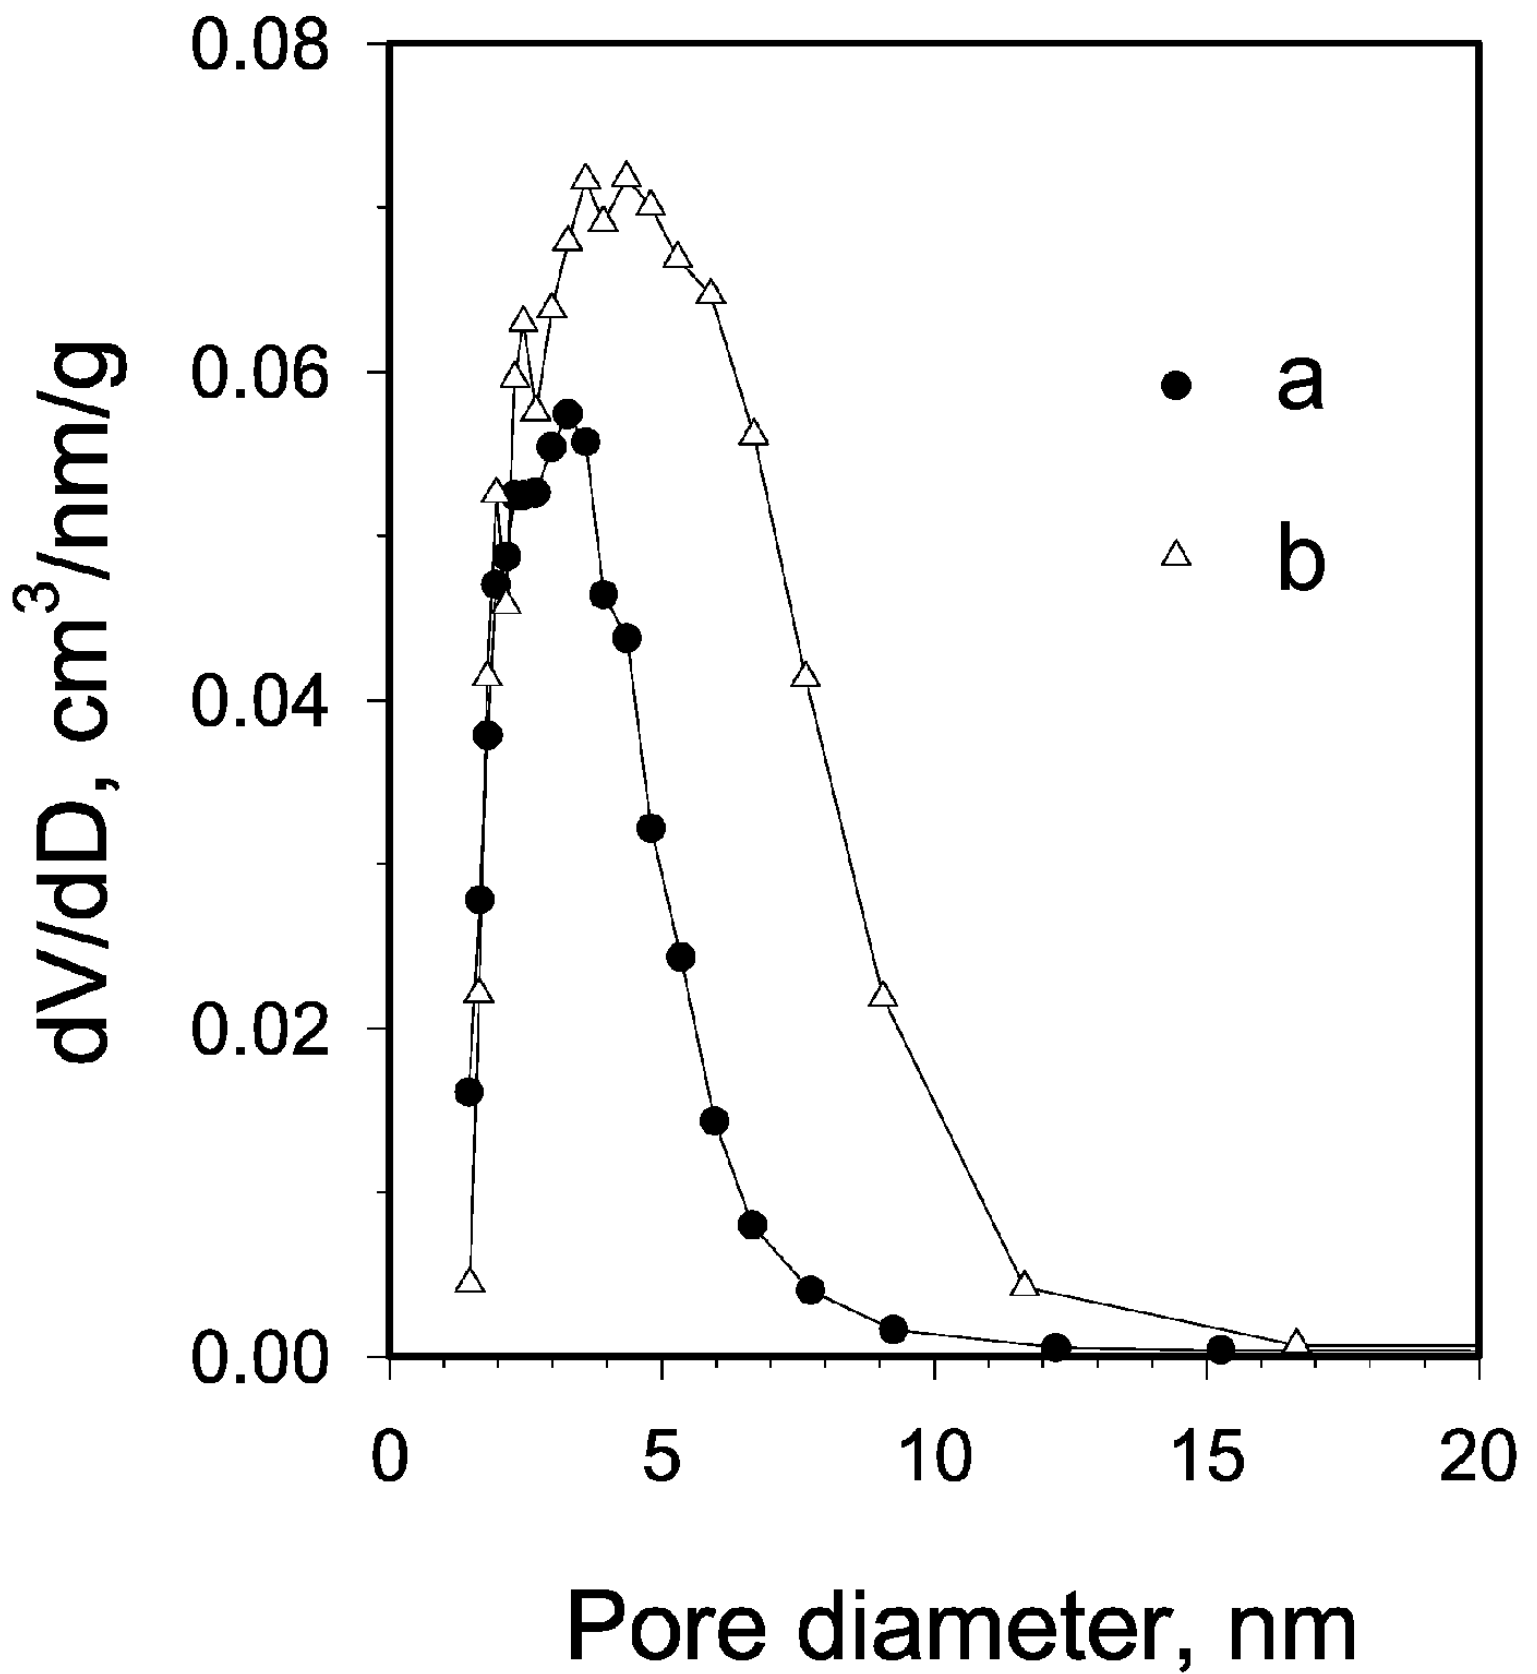

Supplement: b207779p.pdf [file b207779p.pdf]
